# 1 **Molecular Mechanism Underlying Inhibition of Intrinsic** 2 **ATPase Activity in a Ski2-like RNA Helicase**

3

4 Eva Absmeier<sup>1,†,¶,\*</sup>, Karine F. Santos<sup>1,†,#</sup>, Markus C. Wahl<sup>1,2,3,\*</sup>

5

6 <sup>1</sup> Freie Universität Berlin, Institute of Chemistry and Biochemistry, Laboratory of Structural  
7 Biochemistry, Takustraße 6, 14195 Berlin, Germany

8 <sup>2</sup> Helmholtz-Zentrum Berlin für Materialien und Energie, Macromolecular Crystallography,  
9 Albert-Einstein-Str. 15, 12489 Berlin, Germany

10 <sup>3</sup> Lead Contact

11 † These authors contributed equally to this work.

12 ¶ Present address: MRC Laboratory of Molecular Biology, Cambridge Biomedical Campus,  
13 Cambridge CB2 0QH, UK

14 # Present address: Sphingotec GmbH, Neuendorfstr. 15A, 16761 Henningsdorf, Germany

15 \* Correspondence: [absmeier@zedat.fu-berlin.de](mailto:absmeier@zedat.fu-berlin.de); [markus.wahl@fu-berlin.de](mailto:markus.wahl@fu-berlin.de)

16

17 **HIGHLIGHTS**

- 18 • Crystal structures of Brr2 in complex with different adenine nucleotides.
- 19 • The Brr2 N-terminal region counteracts conformational changes induced by ATP binding.
- 20 • Brr2 excludes an attacking water molecule in the absence of substrate RNA.
- 21 • Different helicase families resort to different NTPase mechanisms.

22

23 **KEYWORDS**

24 Brr2; enzyme auto-inhibition; macromolecular crystallography; nucleotide binding; RNA-  
25 dependent NTPase; RNA helicase; spliceosome; Structural Biology

26

## 27 **SUMMARY**

28 RNA-dependent NTPases can act as RNA/RNA-protein remodeling enzymes and typically  
29 exhibit low NTPase activity in the absence of RNA/RNA-protein substrates. How futile intrinsic  
30 NTP hydrolysis is prevented is frequently not known. The ATPase/RNA helicase Brr2 belongs to  
31 the Ski2-like family of nucleic acid-dependent NTPases and is an integral component of the  
32 spliceosome. Comprehensive nucleotide binding and hydrolysis studies are not available for a  
33 member of the Ski2-like family. We present crystal structures of *Chaetomium thermophilum* Brr2  
34 in the apo, ADP-bound and ATPyS-bound states, revealing nucleotide-induced conformational  
35 changes and a hitherto unknown ATPyS binding mode. Our results in conjunction with Brr2  
36 structures in other molecular contexts reveal multiple molecular mechanisms that contribute to the  
37 inhibition of intrinsic ATPase activity, including an N-terminal region that restrains the RecA-like  
38 domains in an open conformation and exclusion of an attacking water molecule, and suggest how  
39 RNA substrate binding can lead to ATPase stimulation.

40

## 41 **INTRODUCTION**

42 RNA-dependent NTPases represent a large group of enzymes that are involved in diverse  
43 aspects of gene expression and gene regulation in all domains of life. Most RNA-dependent  
44 NTPases belong to superfamilies (SFs) 1 or 2 of nucleic acid-dependent NTPases (Jankowsky,  
45 2011). SF1 and SF2 enzymes comprise a core of dual RecA-like motor domains that can bind and  
46 hydrolyze NTPs and that can bind RNA or RNA-protein (RNP) substrates dependent on the NTP-  
47 bound state (Jankowsky and Fairman, 2007). NTP binding, hydrolysis, product release and  
48 rebinding elicit conformational changes, with different conformational states exhibiting different  
49 RNA/RNP affinities. As a consequence, many of these enzymes can bind, deform and release  
50 RNAs/RNPs or translocate on RNAs in an NTPase-dependent manner to achieve, e.g., RNA  
51 duplex unwinding or disruption of RNPs (Singleton et al., 2007).

52 The core RecA-like domains of SF1 and SF2 enzymes contain up to twelve conserved  
53 sequence motifs that mediate and functionally couple the NTP/RNA/RNP transactions (Fairman-  
54 Williams et al., 2010). In addition, many SF1 and SF2 enzymes contain additional domains  
55 inserted into or appended to the core domains, forming helicase units (cassettes), in which the  
56 helicase-associated domains facilitate NTP/RNA/RNP-related activities of the dual-RecA cores  
57 and modulate the precise molecular mechanisms, by which RNA/RNP remodeling is achieved  
58 (Jankowsky, 2011). Based on which motifs are present, the exact sequences of the motifs and the  
59 presence of additional domains, SF1 and SF2 members are divided into several families each  
60 (Fairman-Williams et al., 2010). For instance, SF2 comprises ten families, of which five (Ski2-like,  
61 RIG-I-like, DEAD-box, DEAH/RHA and NS3/NPH-II) contain RNA-dependent NTPases (Fairman-  
62 Williams et al., 2010).

63 To prevent futile NTP hydrolysis, the NTPase activities of RNA-dependent NTPases are auto-  
64 inhibited in the absence of substrate RNAs/RNPs. However, for many SF1 and SF2 enzymes the  
65 precise mechanisms, by which intrinsic NTPase activity is held at check, are presently not known.  
66 Elucidation of such mechanisms requires the determination of atomic-level 3D structures of the  
67 enzymes in different NTP and RNA/RNP substrate-bound states. Detailed NTP binding studies  
68 have been conducted for members of the DEAD-box (Putnam and Jankowsky, 2013), DEAH/RHA  
69 (Taichert et al., 2017) and NS3/NPH-II (Gu and Rice, 2010) families of SF2 enzymes. However,  
70 a similarly comprehensive analysis of a Ski2-like family member has so far not been reported.

71 The ATP-dependent RNA helicase Brr2 is a member of a small subgroup of Ski2-like enzymes  
72 that comprise a tandem repeat of Ski2-like helicase cassettes (Figure 1A). Brr2 is an integral  
73 component of the spliceosome and is required for the remodeling of an initially assembled, pre-  
74 catalytic spliceosome (B complex) into a catalytically competent spliceosome (Xu et al., 1996;  
75 Zhang et al., 2015), during which Brr2 disrupts the U4/U6 di-small nuclear (sn) RNP by unwinding  
76 the U4/U6 di-snRNAs (Bertram et al., 2017; Laggerbauer et al., 1998; Nguyen et al., 2016;  
77 Plaschka et al., 2018; Raghunathan and Guthrie, 1998; Zhan et al., 2018). As in all Ski2-like

78 enzymes, the two RecA-like domains of the Brr2 helicase cassettes are followed by a winged-  
79 helix (WH) domain, a helical bundle (HB) or “ratchet” domain and a helix-loop-helix (HLH) domain;  
80 the Brr2 helicase cassettes additionally comprise a C-terminal immunoglobulin-like (IG) domain  
81 (Figure 1A). While both Brr2 cassettes can bind adenine nucleotides (Santos et al., 2012), only  
82 the N-terminal cassette (NC) can hydrolyze ATP and couple ATP hydrolysis to RNA duplex  
83 unwinding or RNP disruption; the C-terminal cassette (CC) is inactive as an ATPase/helicase (Kim  
84 and Rossi, 1999; Santos et al., 2012).

85 The two helicase cassettes in Brr2 are preceded by a ~450-residue N-terminal region (NTR),  
86 that encompasses two folded domains (“plug” and PWI-like) and adjacent unstructured regions  
87 (Absmeier et al., 2015b, 2015a) (Figure 1A). Functional analyses of stepwise N-terminally  
88 truncated *Chaetomium thermophilum* Brr2 (cBrr2) have shown that the NTR has an inhibitory  
89 effect on Brr2 ATPase, RNA-binding and RNA-unwinding activities *in vitro* (Absmeier et al.,  
90 2015b). *In vivo*, the NTR is essential for yeast viability, stable association of Brr2 with the U4/U6-  
91 U5 tri-snRNP and tri-snRNP stability (Absmeier et al., 2015a; Zhang et al., 2015). Recent cryo-  
92 electron microscopy (cryoEM) structures of yeast U4/U6•U5 tri-snRNPs (Agafonov et al., 2016;  
93 Nguyen et al., 2016; Wan et al., 2016) and of pre-catalytic B complex spliceosomes (Bertram et  
94 al., 2017; Plaschka et al., 2018; Zhan et al., 2018) showed that the NTR is completely detached  
95 from the helicase cassettes to allow Brr2 to engage the U4 snRNA strand of the U4/U6 di-snRNP.

96 Here, we describe crystal structures of a cBrr2 N-terminal truncation variant in the apo, ADP-  
97 bound and ATPyS-bound states. Comparison with members of the other SF2 helicase families  
98 revealed an unusual pre-catalysis conformation in Brr2. We also compared our structures to the  
99 Brr2 subunits in cryoEM structures of the yeast tri-snRNP (Nguyen et al., 2016) and pre-catalytic  
100 spliceosomal B complexes (Bertram et al., 2017; Plaschka et al., 2018; Zhan et al., 2018),  
101 providing a molecular explanation for Brr2’s low intrinsic ATPase activity and for how ATPase  
102 activity is stimulated once the enzyme engages a RNA/RNP substrate.

103

## 104 RESULTS

### 105 Structures of Nucleotide-Bound cBrr2<sup>T4</sup>

106 Removal of almost the entire NTR (residues 1-472) led to a cBrr2 variant (cBrr2<sup>T4</sup>; Figure 1A)  
107 with enhanced intrinsic and RNA-stimulated ATPase activities compared to full-length cBrr2  
108 (Absmeier et al., 2015a). To gain insight into the ATPase mechanism of Brr2, we determined  
109 crystal structures of the cBrr2<sup>T4</sup> variant in the nucleotide-free (apo) state, as well as in complex  
110 with ADP and the non-hydrolyzable ATP analog, ATPγS, at resolutions ranging from 2.8 to 3.3  
111 Å (Table 1). To achieve full nucleotide occupancy and to unequivocally locate coordinated divalent  
112 metal ions, cBrr2<sup>T4</sup> was co-crystallized with ADP•AlF<sub>3</sub> or ATPγS in the presence of Mn<sup>2+</sup> ions, and  
113 the nucleotides and Mn<sup>2+</sup> were included in cryo-protection buffers during crystal harvest.

114 The overall structure of cBrr2<sup>T4</sup> without or with nucleotides resembles previously reported Brr2  
115 helicase structures (Mozaffari-Jovin et al., 2013; Nguyen et al., 2013; Santos et al., 2012)  
116 (Absmeier 2016) (Figure 1B). We did not observe density for the very N-terminal residues (apo  
117 cBrr2<sup>T4</sup>, residues 473-478; cBrr2<sup>T4</sup>-ADP, residues 473-481; cBrr2<sup>T4</sup>-ATPγS, residues 473-477).  
118 Additionally, one loop in the RecA2 domain of the NC (cBrr2<sup>T4</sup>-ADP, residues 741-747; cBrr2<sup>T4</sup>-  
119 ATPγS, residues 743-746) and parts of the C-terminal IG domain (apo cBrr2<sup>T4</sup>, residues 2083-  
120 2093, 2105-2111, 2138-2146, 2158-2163, 2186-2193; cBrr2<sup>T4</sup>-ADP, residues 2080-2093, 2105-  
121 2111, 2160-2170, 2184-2193; cBrr2<sup>T4</sup>-ATPγS, residues 2077-2093, 2105-2110, 2149-2150, 2160-  
122 2170, 2184-2193) could not be built due to missing electron density. Upon co-crystallization with  
123 ADP•AlF<sub>3</sub> or ATPγS, we observed ADP and ATPγS, respectively, in the canonical binding pockets  
124 between the RecA1 and RecA2 domains of the NC and the CC (Figure 1B,C). No density for the  
125 AlF<sub>3</sub> moiety was observed upon co-crystallization with ADP•AlF<sub>3</sub>. Unexpectedly, a third ADP or  
126 ATPγS nucleotide bound between the two cassettes (Figure 1B,C). In the apo cBrr2<sup>T4</sup> structure,  
127 sulfate ions are bound at motif I of the RecA1 domains of the NC and CC, and an additional sulfate  
128 ion is bound between the cassettes (Figure 1C). The sulfate ion in the ATPase-active nucleotide  
129 binding pocket of the NC may resemble a phosphate after nucleotide hydrolysis, as observed for

130 other helicases (Schmitt et al., 2018). Electron densities of the respective nucleotides and the  
131 sulfate ions were well defined in both helicase cassettes and in between the cassettes in the apo  
132 cBrr2<sup>T4</sup>, cBrr2<sup>T4</sup>-ADP and cBrr2<sup>T4</sup>-ATPyS structures (Figure 1C). Positions of divalent cations were  
133 unequivocally derived from the anomalous signals of Mn<sup>2+</sup> ions (Figure 1C).

134

### 135 **Nucleotide Binding to the Active NC Induces Conformational Changes**

136 By truncating residues 1-425, we have previously produced the cBrr2<sup>T3</sup> variant, which retains  
137 a portion of the NTR (the NC-clamp) that encircles the NC and partially inhibits the ATPase and  
138 helicase activities (Absmeier et al., 2015a). Moreover, we have previously determined a crystal  
139 structure of cBrr2<sup>T3</sup> in complex with the Jab1 domain of the cPrp8 protein; cBrr2<sup>T3</sup> could not be  
140 crystallized in the absence of cJab1 (Absmeier et al., 2016a). Comparison of the current cBrr2<sup>T4</sup>  
141 structures with the cBrr2<sup>T3</sup>-cJab1 complex structure revealed that the two RecA domains of the  
142 NC approach each other more closely in the apo cBrr2<sup>T4</sup> structure compared to the cBrr2<sup>T3</sup>-cJab1  
143 complex (distance of the C $\alpha$ -atoms of G554 of motif I and G904 of motif VI 6 Å vs. 8 Å, respectively;  
144 Figure 2A,B). The relative positions of the NC RecA domains in the ADP-bound cBrr2<sup>T4</sup> structure  
145 remain similar to those of the apo cBrr2<sup>T4</sup> structure (Figure 2B,C). However, the RecA1 and RecA2  
146 domains of the NC further approach each other upon ATPyS binding (C $\alpha$ -atom of G554 of motif I  
147 and C $\alpha$ -atom of G904 of motif VI spaced 2 Å closer than in the apo and ADP-bound structures,  
148 and 4 Å closer than in the cBrr2<sup>T3</sup>-cJab1 complex structure; Figure 2D). The observed closing-in  
149 of motifs I and VI on the nucleotide is consistent with the idea that these elements need to contact  
150 bound ATP to facilitate ATP hydrolysis (Fairman-Williams et al., 2010). Consistently, similar  
151 situations have been observed in other RecA domain-containing ATPases (Pyle, 2008).

152 In both nucleotide-bound cBrr2<sup>T4</sup> structures, the conserved Q-motif of the NC (Q533)  
153 coordinates the adenine base through hydrogen bonding at positions N6 and N7 (Figure 2E,F).  
154 Conserved residues of motif I (555-559) interact with the phosphates of ADP and ATPyS (Figure  
155 2E,F). N559 additionally contacts the adenine base. N870 (motif Va; important for coupling of ATP

156 hydrolysis to RNA duplex unwinding) binds the ribose moieties of the nucleotides. The  $\gamma$ -  
157 thiophosphate of ATP $\gamma$ S is additionally recognized by E664 (motif II), Q901 (motif VI) and R905  
158 (motif VI) in the cBrr2<sup>T4</sup>-ATP $\gamma$ S structure, while in the ADP-bound structure residues of motif II do  
159 not contact the nucleotide (Figure 2E,F).

160 The above comparisons suggest that the NC-clamp (contained in cBrr2<sup>T3</sup> but absent from  
161 cBrr2<sup>T4</sup>) stabilizes the RecA domains of the NC in an open, NTPase-inactive conformation,  
162 explaining the previously observed lower intrinsic ATPase activity of cBrr2 truncations that include  
163 the NC-clamp compared to cBrr2<sup>T4</sup> (Absmeier et al., 2015a). They also illustrate how only ATP,  
164 but not ADP, can engage motifs II and VI, leading to further NTPase-supporting closure of the  
165 nucleotide binding cleft.

166

### 167 **The Intrinsic ATPase Activity of cBrr2<sup>T4</sup> Is Attenuated by Exclusion of an Attacking Water**

168 Comparison of our cBrr2<sup>T4</sup>-ATP $\gamma$ S structure with the *C. thermophilum* DEAH/RHA-box RNA  
169 helicase Prp43 (cPrp43) bound to ADP•BeF<sub>3</sub>, mimicking bound ATP in the ground state (Tauchert  
170 et al., 2017), revealed a strikingly different position of a conserved glutamine (Q901 in cBrr2; Q428  
171 in cPrp43) and arginine (R908 in cBrr2; R435 in cPrp43) in motif VI relative to the respective ATP  
172 analog (Figure 3A,B). In the cPrp43 structure (Figure 3B), Q428 resides approximately 6 Å from  
173 the BeF<sub>3</sub> (representing the  $\gamma$ -phosphate) and positions (and possibly polarizes), together with  
174 E219 (motif II) and R432 (motif VI), an attacking water at 3 Å distance from and in line with the  
175 “scissile” bond of the  $\gamma$ -phosphate surrogate. Additionally, R435 of motif VI (arginine finger)  
176 interacts with the  $\beta$ -phosphate and BeF<sub>3</sub> in the cPrp43 structure. In the cBrr2<sup>T4</sup>-ATP $\gamma$ S structure,  
177 the corresponding Q901 is positioned much closer (3 Å) to and engages in direct interactions with  
178 the  $\gamma$ -thiophosphate (Figure 3A). This close approach apparently prevents positioning of an  
179 attacking water molecule in the cBrr2<sup>T4</sup>-ATP $\gamma$ S structure (Figure 3A). In addition, R908 (arginine  
180 finger) is flipped away from the bound nucleotide and does not contact the  $\beta$  and  $\gamma$ -phosphates.



181 Superposition of the cBrr2<sup>T4</sup>-ATP $\gamma$ S structure with Brr2 bound to U4/U6 di-snRNA in a yeast  
182 U4/U6•U5 tri-snRNP (Nguyen et al., 2016) or pre-catalytic B complex (Bertram et al., 2017;  
183 Plaschka et al., 2018; Zhan et al., 2018) suggests a movement of the helix bearing motif VI, and  
184 thus Q901 and R908, upon RNA binding (Figure 3C). This conformational change may displace  
185 Q901 from the  $\gamma$ -phosphate and allow it to productively position an attacking water, as seen in the  
186 cPrp43-ADP•BeF<sub>3</sub> structure. In addition, the movement of motif VI would bring R908 closer to the  
187 ATP  $\beta$  and  $\gamma$ -phosphates, where it can contribute to nucleotide hydrolysis (Figure 3C).  
188 Superposition of cPrp43 bound to RNA and ADP•BeF<sub>3</sub> and yeast Brr2 bound to U4/U6 di-snRNA  
189 reveals a similar position of motif VI, further supporting this model (Figure 3D). Thus, in addition  
190 to NC-clamp-mediated RecA domain opening, exclusion of an attacking water molecule by direct  
191 interaction of Q901 and the ATP  $\gamma$ -phosphate in the absence of substrate RNA appears to be  
192 another mechanism that ensures a low intrinsic ATPase activity in Brr2.

193

#### 194 **Nucleotide Binding at the CC and Cassette Interface**

195 Unlike in the active NC, the RecA1 and RecA2 domains of the CC do not approach each other  
196 upon ATP $\gamma$ S binding (Figure S1A,B). While a similar situation has previously also been observed  
197 for an N-terminal truncation variant of human Brr2 (Santos et al., 2012), in this latter case  
198 nucleotides could only be soaked into pre-formed apo crystals after chemical crosslinking, leaving  
199 the authentic conformational response of the CC to nucleotide binding an open question.

200 Interestingly, in both nucleotide-bound cBrr2<sup>T4</sup> structures, an additional ADP or ATP $\gamma$ S  
201 molecule was observed, wedged between the RecA1 and IG domains of the NC and the RecA2  
202 and HB domains of the CC (Figure S1C). This ADP/ATP $\gamma$ S is mainly coordinated by side chain  
203 interactions with the phosphates. In addition, there are two main chain interactions with the base  
204 and one with the ribose (Figure S1C). The additional nucleotide binding site does not resemble  
205 any of the typical nucleotide binding pockets known in RNA helicases. Superposition of cBrr2<sup>T4</sup>-  
206 ATP $\gamma$ S and yeast Brr2 bound to U4/U6 di-snRNA revealed that the additional nucleotide binding

207 site represents part of the U4/U6 di-snRNA binding surface of Brr2 (Figure S1D). A nucleotide  
208 bound at this position may thus interfere with RNA binding and/or may restrict cassette movements  
209 possibly required for RNA duplex unwinding. To test these ideas, we performed gel-based  
210 unwinding assays with increasing concentrations of ATP. In agreement with the structures, we  
211 observed inhibition of cBrr2<sup>T4</sup>-mediated U4/U6 unwinding at very high ATP concentrations (15  
212 mM; Figure S1E). Recently, a Brr2-specific small-molecule inhibitor was identified, which binds at  
213 the interface of the two helicase cassette, but at a site different from the additional nucleotide  
214 binding site in the present structures (Iwatani-Yoshihara et al., 2017). Thus, our structural results  
215 reveal a new binding pocket at the cassette interface of Brr2, which may be further exploited for  
216 inhibitor design.

217

## 218 **DISCUSSION**

### 219 **Influence of N-Terminal Regions on Nucleotide Binding in Ski2-Like Helicases**

220 Here, we analyzed the structural basis of nucleotide binding to the Ski2-like RNA helicase, Brr2.  
221 Our results revealed multiple levels of auto-inhibition that prevent futile intrinsic ATPase activity.  
222 To date only two other structures of Ski2-like helicases bound to an ATP analog have been  
223 reported. In the AMPPNP-bound structure of yeast Ski2 (Halbach et al., 2012), the two RecA  
224 domains are in close proximity and the AMPPNP phosphates are recognized by motifs I and VI,  
225 resembling the cBrr2<sup>T4</sup>-ATP $\gamma$ S structure. However, due to the lack of divalent cations in the  
226 crystallization condition, the density for the  $\gamma$ -phosphate is weakly defined in the Ski2-AMPPNP  
227 structure, and not all hydrolysis-relevant contacts to the nucleotide are formed. As in the present  
228 nucleotide-bound structure of cBrr2<sup>T4</sup>, the Ski2 arginine finger of motif VI is flipped away and does  
229 not contact the nucleotide, suggesting that Ski2-like RNA helicases in general bind ATP initially in  
230 a pre-hydrolysis state. Interestingly, Ski2 also contains a long NTR that was removed for  
231 crystallization. As in the case of Brr2, removal of the NTR might have led to a movement of the

232 RecA domains towards each other; thus, modulation of nucleotide binding/hydrolysis by an N-  
233 terminal region may be a recurring theme in some Ski2-like enzymes.

234 In contrast, no conformational changes were observed in the *Pyrococcus furiosus* Hel308  
235 protein, Hjm, upon AMPPCP binding (Oyama et al., 2009). The ATP analog interacted only with  
236 motifs located in the RecA1 domain (Oyama et al., 2009). Moreover, in the Hjm-AMPPCP structure  
237 neither of the conserved arginines in motif VI engages in interactions with the nucleotide,  
238 supporting the idea that an inactive state has been captured. Hjm contains a very short NTR  
239 compared to Brr2 and Ski2. This NTR folds back onto the RecA1 domain but does not  
240 concomitantly contact the RecA2 domain and, thus, is not expected to restrict RecA domain  
241 conformational changes required for stable nucleotide binding. A possible explanation for the lack  
242 of conformational changes upon AMPPCP binding in this study may be that the nucleotide bound-  
243 state of Hjm was obtained upon soaking of apo Hjm crystals with AMPPCP. The two RecA  
244 domains engage in several crystal contacts, which might have prevented them from adopting a  
245 closed conformation upon AMPPCP binding. In any case, the analysis illustrates that NTR-based  
246 modulation of nucleotide binding is apparently not universally conserved in Ski2-like helicases.

247

#### 248 **RNA Binding Triggers Adoption of an ATPase-Competent State**

249 Our structures of apo cBrr2<sup>T4</sup>, cBrr2<sup>T4</sup>-ADP and cBrr2<sup>T4</sup>-ATP<sub>γ</sub>S reveal a movement of the  
250 RecA1 and RecA2 domains towards each other upon ATP<sub>γ</sub>S, but not ADP, binding, as observed  
251 for other ATPases containing two RecA domains (Ye et al., 2004). ATP<sub>γ</sub>S is highly coordinated in  
252 our cBrr2<sup>T4</sup>-ATP<sub>γ</sub>S structure by motifs of both RecA domains, resembling ADP-BeF<sub>3</sub> in the active  
253 site of the cPrp43 DEAH/RHA-box helicase (Tauchert et al., 2017). However, there are important  
254 differences. The arginine finger residing in motif VI (R908) does not contact the nucleotide in the  
255 cBrr2<sup>T4</sup>-ATP<sub>γ</sub>S structure, which would be necessary for a fully hydrolysis-competent conformation.  
256 In addition, there is no evidence for a water molecule positioned in line with the β-γ phospho-  
257 anhydride bond of ATP<sub>γ</sub>S (representing the scissile bond of ATP). Comparison to the cPrp43-

258 ADP•BeF<sub>3</sub> structure (Tauchert et al., 2017) indicates that a conserved glutamine of motif VI in Brr2  
259 has to be relocated to allow positioning of an attacking water (Figure 3A). We suggest that RNA  
260 binding is the final trigger that induces a switch in Brr2 towards the fully hydrolysis-competent  
261 conformation. Such a mechanism would additionally aid in preventing unproductive ATP  
262 hydrolysis in the absence of RNA. In full agreement with this idea, the conformation of Brr2, when  
263 bound to its U4/U6 substrate (Bertram et al., 2017; Nguyen et al., 2016; Plaschka et al., 2018;  
264 Zhan et al., 2018) reveals conformational rearrangements towards a hydrolysis-competent state  
265 (Figure 3C).

266

### 267 **Helicases Exhibit Family-Specific Nucleotide Hydrolysis Mechanisms**

268 The structures of cPrp43 bound to ADP and ADP•BeF<sub>3</sub> (Tauchert et al., 2017) showed  
269 surprising flexibility of certain domains upon binding to different nucleotides (Figure 4A). Binding  
270 of ADP•BeF<sub>3</sub> results in a rotation of the RecA2 domain, which breaks the interactions of a long  $\beta$   
271 hairpin in the RecA2 domain (the equivalent of the separator loop [SL] in Ski2-like helicases), with  
272 the HB domain (Figure 4A). As a consequence, the HB/ratchet and OB-fold domains, which form  
273 part of the RNA binding tunnel, open up and form a groove, which can accommodate even  
274 complex RNA folds. Superposition of the apo cBrr2<sup>T4</sup> and cBrr2<sup>T4</sup>-ATPyS structures, reveal that  
275 the SL of Brr2 still interacts with the HB domain and that the HB/HLH/IG domains (the Sec63  
276 homology region) rotate together with the RecA2 domain upon ATPyS binding (Figure 4B), similar  
277 to the situation in Ski2 (Halbach et al., 2012). In agreement with the different behavior upon  
278 nucleotide binding, the SL-like elements has different functions in different SF2 members. The  
279 elongated SL-like element in cPrp43 is thought to control access to the RNA binding site (Tauchert  
280 et al., 2017). In Ski2-like helicases, the SL is much shorter and acts as a tool that separates the  
281 strands of the substrate RNA duplex (Büttner et al., 2007; Woodman et al., 2007). In addition,  
282 unlike in our cBrr2<sup>T4</sup> structures, an attacking water molecule is already present in cPrp43 in the  
283 absence of RNA, and RNA binding does not significantly change the ADP•BeF<sub>3</sub> coordination.

284 Taken together, the mechanism of RecA domain closure and coordination of the attacking  
285 water by a glutamate in motif II and by glutamine and arginine residues in motif VI may be  
286 conserved, but the trigger for adopting the ultimate hydrolysis-competent state seems to differ in  
287 different SF2 families. In the future, further structural studies of Ski-2 like helicases bound to  
288 nucleic acid and nucleotides need to be performed to elucidate the exact mechanism of ATP  
289 hydrolysis and to understand the differences to other SF2 families.

290

## 291 **SUPPLEMENTAL INFORMATION**

292 Supplemental Information includes Figure and can be found with this article online at <https://...>

293 .

294

## 295 **ACKNOWLEDGEMENTS**

296 We acknowledge access to beamline BL14.1 of the BESSY II storage ring (Berlin, Germany)  
297 *via* the Joint Berlin MX Laboratory sponsored by Helmholtz Zentrum Berlin für Materialien und  
298 Energie, Freie Universität Berlin, Humboldt-Universität zu Berlin, Max-Delbrück Centrum, Leibniz-  
299 Institut für Molekulare Pharmakologie and Charité – Universitätsmedizin Berlin. We thank Dr.  
300 Manfred S. Weiss for support during diffraction data collection. This work was supported by a grant  
301 from the Deutsche Forschungsgemeinschaft (TRR186-A15) to MCW. KFS was supported by a  
302 Dahlem International PostDoc Fellowship of Freie Universität Berlin.

303

## 304 **AUTHOR CONTRIBUTIONS**

305 EA purified protein and performed activity assays and crystallization trials, determined and  
306 refined crystal structures and wrote the manuscript with KFS and MCW. All authors participated  
307 in data interpretation.

308

309 **DECLARATION OF INTERESTS**

310 The authors declare no competing interests.

311

## 312 REFERENCES

- 313 Absmeier, E., Becke, C., Wollenhaupt, J., Santos, K.F., and Wahl, M.C. (2016a). Interplay of cis-  
314 and trans-regulatory mechanisms in the spliceosomal RNA helicase Brr2. *Cell Cycle*.
- 315 Absmeier, E., Wollenhaupt, J., Mozaffari-Jovin, S., Becke, C., Lee, C.-T., Preussner, M., Heyd,  
316 F., Urlaub, H., Lührmann, R., Santos, K.F., et al. (2015a). The large N-terminal region of the Brr2  
317 RNA helicase guides productive spliceosome activation. *Genes Dev.* *29*, 2576–2587.
- 318 Absmeier, E., Rosenberger, L., Apelt, L., Becke, C., Santos, K.F., Stelzl, U., and Wahl, M.C.  
319 (2015b). A noncanonical PWI domain in the N-terminal helicase-associated region of the  
320 spliceosomal Brr2 protein. *Acta Crystallogr. D Biol. Crystallogr.* *71*, 762–771.
- 321 Agafonov, D.E., Kastner, B., Dybkov, O., Hofele, R.V., Liu, W.-T., Urlaub, H., Lührmann, R., and  
322 Stark, H. (2016). Molecular architecture of the human U4/U6.U5 tri-snRNP. *Science* *351*, 1416–  
323 1420.
- 324 Bertram, K., Agafonov, D.E., Dybkov, O., Haselbach, D., Leelaram, M.N., Will, C.L., Urlaub, H.,  
325 Kastner, B., Lührmann, R., and Stark, H. (2017). Cryo-EM Structure of a Pre-catalytic Human  
326 Spliceosome Primed for Activation. *Cell* *170*, 701-713.e11.
- 327 Büttner, K., Nehring, S., and Hopfner, K.-P. (2007). Structural basis for DNA duplex separation by  
328 a superfamily-2 helicase. *Nat. Struct. Mol. Biol.* *14*, 647–652.
- 329 Chen, V.B., Arendall, W.B., Headd, J.J., Keedy, D.A., Immormino, R.M., Kapral, G.J., Murray,  
330 L.W., Richardson, J.S., and Richardson, D.C. (2010). MolProbity: all-atom structure validation for  
331 macromolecular crystallography. *Acta Crystallogr. D Biol. Crystallogr.* *66*, 12–21.
- 332 Emsley, P., Lohkamp, B., Scott, W.G., and Cowtan, K. (2010). Features and development of Coot.  
333 *Acta Crystallogr. D Biol. Crystallogr.* *66*, 486–501.
- 334 Fairman-Williams, M.E., Guenther, U.-P., and Jankowsky, E. (2010). SF1 and SF2 helicases:  
335 family matters. *Curr. Opin. Struct. Biol.* *20*, 313–324.
- 336 Gu, M., and Rice, C.M. (2010). Three conformational snapshots of the hepatitis C virus NS3  
337 helicase reveal a ratchet translocation mechanism. *Proc. Natl. Acad. Sci. U. S. A.* *107*, 521–528.
- 338 Halbach, F., Rode, M., and Conti, E. (2012). The crystal structure of *S. cerevisiae* Ski2, a DEXH  
339 helicase associated with the cytoplasmic functions of the exosome. *RNA* *18*, 124–134.
- 340 Iwatani-Yoshihara, M., Ito, M., Klein, M.G., Yamamoto, T., Yonemori, K., Tanaka, T., Miwa, M.,  
341 Morishita, D., Endo, S., Tjhen, R., et al. (2017). Discovery of Allosteric Inhibitors Targeting the  
342 Spliceosomal RNA Helicase Brr2. *J. Med. Chem.* *60*, 5759–5771.
- 343 Jankowsky, E. (2011). RNA helicases at work: binding and rearranging. *Trends Biochem. Sci.* *36*,  
344 19–29.
- 345 Jankowsky, E., and Fairman, M.E. (2007). RNA helicases — one fold for many functions. *Curr.*  
346 *Opin. Struct. Biol.* *17*, 316–324.
- 347 Karplus, P.A., and Diederichs, K. (2015). Assessing and maximizing data quality in  
348 macromolecular crystallography. *Curr. Opin. Struct. Biol.* *34*, 60–68.

- 349 Kim, D.H., and Rossi, J.J. (1999). The first ATPase domain of the yeast 246-kDa protein is  
350 required for in vivo unwinding of the U4/U6 duplex. *RNA* 5, 959–971.
- 351 Laggerbauer, B., Achsel, T., and Lührmann, R. (1998). The human U5-200kD DEXH-box protein  
352 unwinds U4/U6 RNA duplexes in vitro. *Proc. Natl. Acad. Sci.* 95, 4188–4192.
- 353 McCoy, A.J., Grosse-Kunstleve, R.W., Adams, P.D., Winn, M.D., Storoni, L.C., and Read, R.J.  
354 (2007). Phaser crystallographic software. *J. Appl. Crystallogr.* 40, 658–674.
- 355 Mozaffari-Jovin, S., Wandersleben, T., Santos, K.F., Will, C.L., Lührmann, R., and Wahl, M.C.  
356 (2013). Inhibition of RNA Helicase Brr2 by the C-Terminal Tail of the Spliceosomal Protein Prp8.  
357 *Science* 341, 80–84.
- 358 Mueller, U., Förster, R., Hellmig, M., Huschmann, F.U., Kastner, A., Malecki, P., Pühringer, S.,  
359 Röwer, M., Sparta, K., Steffien, M., et al. (2015). The macromolecular crystallography beamlines  
360 at BESSY II of the Helmholtz-Zentrum Berlin: Current status and perspectives. *Eur. Phys. J. Plus*  
361 130, 1–10.
- 362 Nguyen, T.H.D., Galej, W.P., Bai, X., Oubridge, C., Newman, A.J., Scheres, S.H.W., and Nagai,  
363 K. (2016). Cryo-EM structure of the yeast U4/U6.U5 tri-snRNP at 3.7 Å resolution. *Nature* 530,  
364 298–302.
- 365 Oyama, T., Oka, H., Mayanagi, K., Shirai, T., Matoba, K., Fujikane, R., Ishino, Y., and Morikawa,  
366 K. (2009). Atomic structures and functional implications of the archaeal RecQ-like helicase Hjm.  
367 *BMC Struct. Biol.* 9, 2.
- 368 Plaschka, C., Lin, P.-C., Charenton, C., and Nagai, K. (2018). Prespliceosome structure provides  
369 insights into spliceosome assembly and regulation. *Nature* 559, 419–422.
- 370 Putnam, A.A., and Jankowsky, E. (2013). DEAD-box Helicases as Integrators of RNA, Nucleotide  
371 and Protein Binding. *Biochim. Biophys. Acta* 1829, 884–893.
- 372 Raghunathan, P.L., and Guthrie, C. (1998). RNA unwinding in U4/U6 snRNPs requires ATP  
373 hydrolysis and the DEIH-box splicing factor Brr2. *Curr. Biol.* 8, 847–855.
- 374 Santos, K.F., Jovin, S.M., Weber, G., Pena, V., Lührmann, R., and Wahl, M.C. (2012). Structural  
375 basis for functional cooperation between tandem helicase cassettes in Brr2-mediated remodeling  
376 of the spliceosome. *Proc. Natl. Acad. Sci.* 109, 17418–17423.
- 377 Schmitt, A., Hamann, F., Neumann, P., and Ficner, R. (2018). Crystal structure of the spliceosomal  
378 DEAH-box ATPase Prp2. *Acta Crystallogr. Sect. Struct. Biol.* 74, 643–654.
- 379 Singleton, M.R., Dillingham, M.S., and Wigley, D.B. (2007). Structure and Mechanism of Helicases  
380 and Nucleic Acid Translocases. *Annu. Rev. Biochem.* 76, 23–50.
- 381 Sparta, K.M., Krug, M., Heinemann, U., Mueller, U., and Weiss, M.S. (2016). XDSAPP2.0. *J. Appl.*  
382 *Crystallogr.* 49, 1085–1092.
- 383 Tauchert, M.J., Fourmann, J.-B., Lührmann, R., and Ficner, R. (2017). Structural insights into the  
384 mechanism of the DEAH-box RNA helicase Prp43. *ELife* 6, e21510.
- 385 Trowitzsch, S., Bieniossek, C., Nie, Y., Garzoni, F., and Berger, I. (2010). New baculovirus  
386 expression tools for recombinant protein complex production. *J. Struct. Biol.* 172, 45–54.



- 387 Wan, R., Yan, C., Bai, R., Wang, L., Huang, M., Wong, C.C.L., and Shi, Y. (2016). The 3.8 Å  
388 structure of the U4/U6.U5 tri-snRNP: Insights into spliceosome assembly and catalysis. *Science*  
389 *351*, 466–475.
- 390 Woodman, I.L., Briggs, G.S., and Bolt, E.L. (2007). Archaeal Hel308 domain V couples DNA  
391 binding to ATP hydrolysis and positions DNA for unwinding over the helicase ratchet. *J. Mol. Biol.*  
392 *374*, 1139–1144.
- 393 Xu, D., Nouraini, S., Field, D., Tang, S.J., and Friesen, J.D. (1996). An RNA-dependent ATPase  
394 associated with U2/U6 snRNAs in pre-mRNA splicing. *Nature* *381*, 709–713.
- 395 Ye, J., Osborne, A.R., Groll, M., and Rapoport, T.A. (2004). RecA-like motor ATPases—lessons  
396 from structures. *Biochim. Biophys. Acta BBA - Bioenerg.* *1659*, 1–18.
- 397 Zhan, X., Yan, C., Zhang, X., Lei, J., and Shi, Y. (2018). Structures of the human pre-catalytic  
398 spliceosome and its precursor spliceosome. *Cell Res.* *28*, 1129–1140.
- 399 Zhang, L., Li, X., Hill, R.C., Qiu, Y., Zhang, W., Hansen, K.C., and Zhao, R. (2015). Brr2 plays a  
400 role in spliceosomal activation in addition to U4/U6 unwinding. *Nucleic Acids Res.*
- 401

402 **TABLES**

403 **Table 1. Crystallographic Data**

| Data collection                          |                      |                      |                      |
|------------------------------------------|----------------------|----------------------|----------------------|
| Structure                                | Apo                  | ADP                  | ATPyS                |
| Wavelength [Å]                           | 0.9184               | 0.9184               | 1.8814               |
| Space group                              | P3 <sub>1</sub>      | P3 <sub>1</sub>      | P3 <sub>1</sub>      |
| Unit cell parameters                     |                      |                      |                      |
| a (=b) [Å]                               | 124.5                | 125.1                | 124.8                |
| c [Å]                                    | 128.0                | 127.4                | 127.1                |
| Resolution [Å] <sup>a</sup>              | 50.0-3.3 (3.39-3.30) | 50.0-2.8 (2.97-2.80) | 50.0-2.7 (2.77-2.70) |
| Reflections                              |                      |                      |                      |
| Total                                    | 146,127 (10,060)     | 579,441 (92,330)     | 625,210 (45,316)     |
| Unique                                   | 33,329 (2,454)       | 54,996 (8,834)       | 60,260 (4,413)       |
| Multiplicity                             | 4.4 (4.1)            | 10.5 (10.5)          | 10.4 (10.3)          |
| Completeness [%]                         | 99.8 (99.7)          | 99.5 (98.8)          | 99.1 (98.1)          |
| Mean I/σ(I)                              | 7.4 (1.2)            | 13.6 (1.0)           | 13.4 (1.0)           |
| R <sub>meas</sub> (I) [%] <sup>(b)</sup> | 27.3 (157.6)         | 21.0 (264.3)         | 15.1 (251.6)         |
| CC <sub>1/2</sub> [%] <sup>(c)</sup>     | 98.1 (36.8)          | 99.7 (43.1)          | 99.9 (38.7)          |
| Refinement                               |                      |                      |                      |
| Structure                                | Apo                  | ADP                  | ATPyS                |
| Resolution [Å] <sup>a</sup>              | 50-3.3 (3.40-3.30)   | 50-2.9 (3.00-2.90)   | 50-2.8 (2.90-2.80)   |
| Reflections                              |                      |                      |                      |
| Unique                                   | 33,295 (3,328)       | 49,300 (4,891)       | 54,133 (5,401)       |
| Test set [%]                             | 5.9                  | 5                    | 5                    |
| R <sub>work</sub> [%] <sup>(d)</sup>     | 20.6 (32.2)          | 22.0 (35.3)          | 20.8 (30.9)          |
| R <sub>free</sub> [%] <sup>(e)</sup>     | 26.2 (37.6)          | 27.1 (42.1)          | 25.9 (36.3)          |
| Contents of A.U. <sup>(f)</sup>          |                      |                      |                      |
| Non-H atoms                              | 13,495               | 13,417               | 13,506               |
| Protein residues                         | 1680                 | 1657                 | 1666                 |
| ADP/ATPyS                                | 0                    | 3                    | 3                    |
| Mn <sup>2+</sup> ions                    | 0                    | 2                    | 3                    |
| Water oxygens                            | 2                    | 43                   | 40                   |
| Mean B factors [Å <sup>2</sup> ]         |                      |                      |                      |
| Wilson                                   | 77.4                 | 71.5                 | 73.4                 |
| Model atoms                              | 89.5                 | 89.2                 | 91.2                 |
| Rmsd <sup>(g)</sup> from ideal geometry  |                      |                      |                      |
| Bond lengths [Å]                         | 0.003                | 0.003                | 0.002                |
| Bond angles [°]                          | 0.58                 | 0.61                 | 0.53                 |
| Model quality <sup>(h)</sup>             |                      |                      |                      |
| Overall score                            | 2.30                 | 2.28                 | 1.96                 |
| Clash score                              | 9.95                 | 8.40                 | 6.42                 |
| Ramachandran favored [%]                 | 95.9                 | 96.3                 | 97.1                 |
| Ramachandran outliers [%]                | 0.0                  | 0.0                  | 0.0                  |
| PDB ID                                   | 6QWS                 | 6QV3                 | 6QV4                 |

- 404
- 405 <sup>a</sup> Values in parentheses refer to the highest resolution shells.
- 406 <sup>b</sup>  $R_{meas}(I) = \sum_h [N/(N-1)]^{1/2} \sum_i |I_{ih} - \langle I_h \rangle| / \sum_h \sum_i I_{ih}$ , in which  $\langle I_h \rangle$  is the mean intensity of symmetry-equivalent
- 407 reflections  $h$ ,  $I_{ih}$  is the intensity of a particular observation of  $h$  and  $N$  is the number of redundant
- 408 observations of reflection  $h$ .
- 409 <sup>c</sup>  $CC_{1/2} = (\langle I^2 \rangle - \langle I \rangle^2) / (\langle I^2 \rangle - \langle I \rangle^2) + \sigma^2_{\epsilon}$ , in which  $\sigma^2_{\epsilon}$  is the mean error within a half-dataset (Karplus and
- 410 Diederichs, 2015).
- 411 <sup>d</sup>  $R_{work} = \sum_h |F_o - F_c| / \sum F_o$  (working set, no  $\sigma$  cut-off applied).
- 412 <sup>e</sup>  $R_{free}$  is the same as  $R_{work}$ , but calculated on the test set of reflections excluded from refinement.

413    <sup>f</sup>    A.U. – asymmetric unit.  
414    <sup>g</sup>    Rmsd – root-mean-square deviation  
415    <sup>h</sup>    Calculated with MolProbity (Chen et al., 2010).  
416

417 **FIGURES AND FIGURE LEGENDS**

A

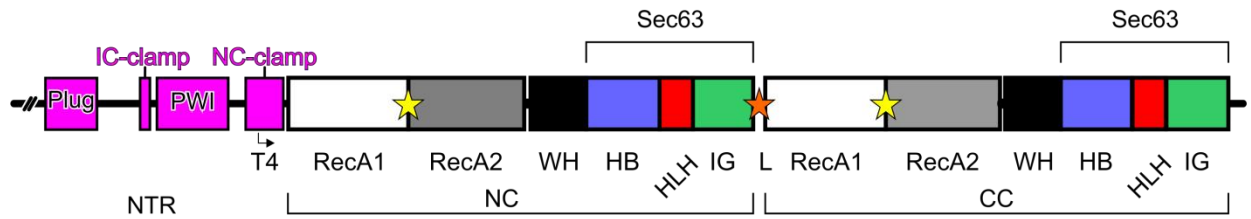

B

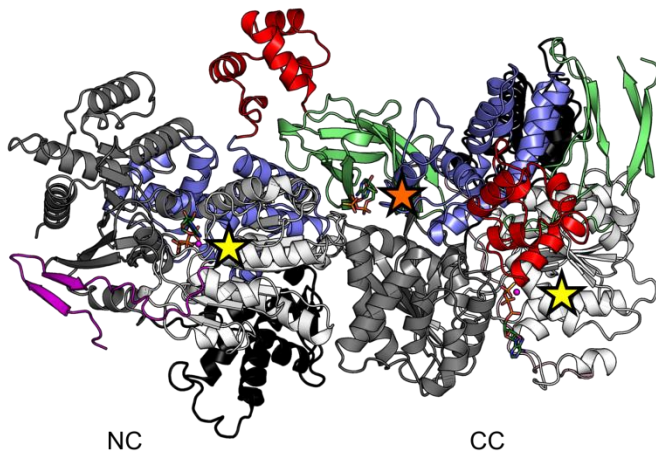

C

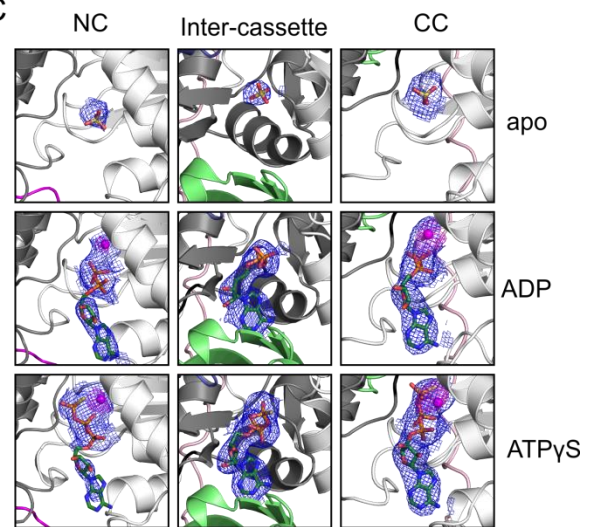

418

419

420 **Figure 1. Brr2 Domain Organization and Nucleotide Binding**

421 (A) Scheme showing the Brr2 domain organization. The angled arrow indicates the starting

422 position of cBrr2<sup>T4</sup>. NTR, N-terminal region; plug, plug domain; PWI, PWI-like domain, IC-clamp,

423 inter-cassette clamp; NC-clamp, N-terminal cassette clamp; NC, N-terminal cassette; CC, C-

424 terminal cassette; WH, winged helix domain; HB, helical bundle domain; HLH, helix-loop-helix

425 domain; IG, immunoglobulin-like domain; L, linker; Sec63, Sec63 homology unit. Yellow stars

426 indicate the canonical nucleotide binding pockets between the RecA domains in the NC and CC.

427 The orange star indicates the position of the third nucleotide bound between the NC and CC. (B)

428 Overall structure of cBrr2<sup>T4</sup> bound to ATPγS. Domains/regions are colored as in (A). (C)

429 Composite 2F<sub>o</sub>-F<sub>c</sub> omit maps (blue; contoured at the 1 σ-level) of the bound sulfate ions and

430 nucleotides, and anomalous difference Fourier maps (magenta; contoured at the 4 σ-level)

431 showing positions of Mn<sup>2+</sup> ions (magenta spheres). Sulfate ions, ADP and ATPγS are shown as

432 sticks and colored by atom type (carbon, dark green; nitrogen, blue; oxygen, red; phosphorus,  
433 orange; sulfur, yellow).  
434

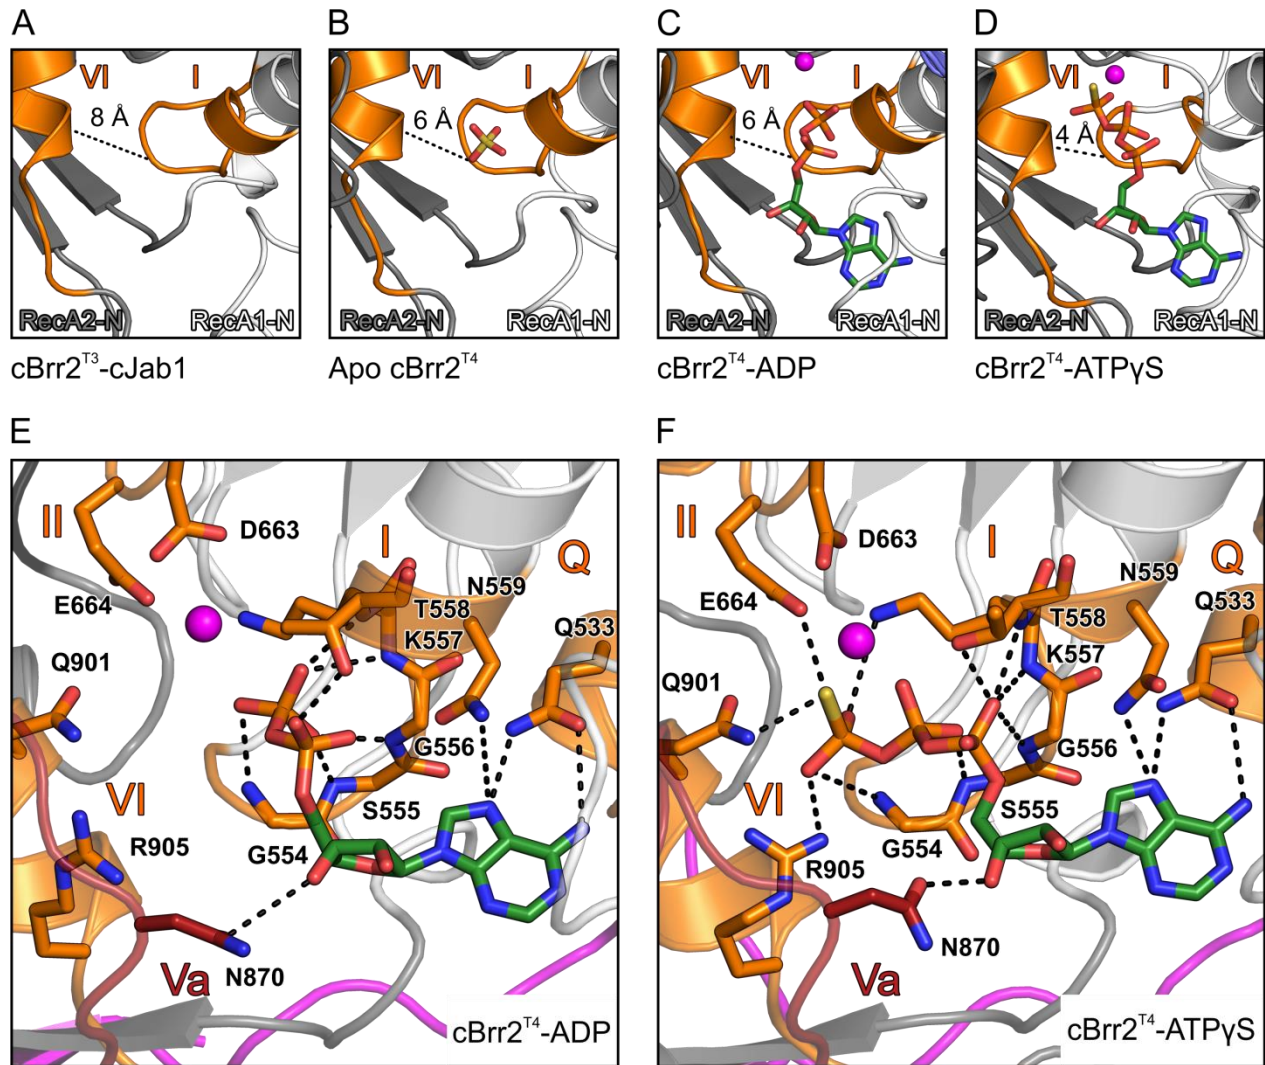

435

436

### 437 **Figure 2. Nucleotide-Induced Conformational Changes in the NC**

438 (A-D) Comparison of the distances (dashed lines) between motif I (Ca-atom of G554 in RecA1-N)

439 and motif VI (Ca-atom of G904 in RecA2-N) in cBrr2<sup>T3</sup>-cJab1 (A; cJab1 has been omitted for

440 clarity), apo cBrr2<sup>T4</sup> (B), cBrr2<sup>T4</sup>-ADP (C) and cBrr2<sup>T4</sup>-ATPyS (D). RecA1/2-N, RecA1/2 domains

441 of NC. Domain coloring as in Figure 1; motif I and motif VI, orange. Sulfate ions, ADP and ATPyS

442 are shown as sticks and colored by atom type (carbon, dark green; nitrogen, blue; oxygen, red;

443 phosphorus, orange; sulfur, yellow). Magenta spheres, Mn<sup>2+</sup> ions. (E,F) Details of the nucleotide

444 coordination in the NC of cBrr2<sup>T4</sup>-ADP (E) and cBrr2<sup>T4</sup>-ATPyS (F). Coloring of domains/regions,

445 nucleotides and Mn<sup>2+</sup> ions as in (A-D). Interacting residues are shown as sticks and colored by

446 atom type (carbon as the respective domain/region; nitrogen, blue; oxygen, red). For interactions  
447 involving only protein backbone atoms, side chains are not shown for clarity. Dashed lines indicate  
448 hydrogen bonds or salt bridges. Structures were aligned with respect to their motifs I in the NC  
449 RecA1 domains.  
450

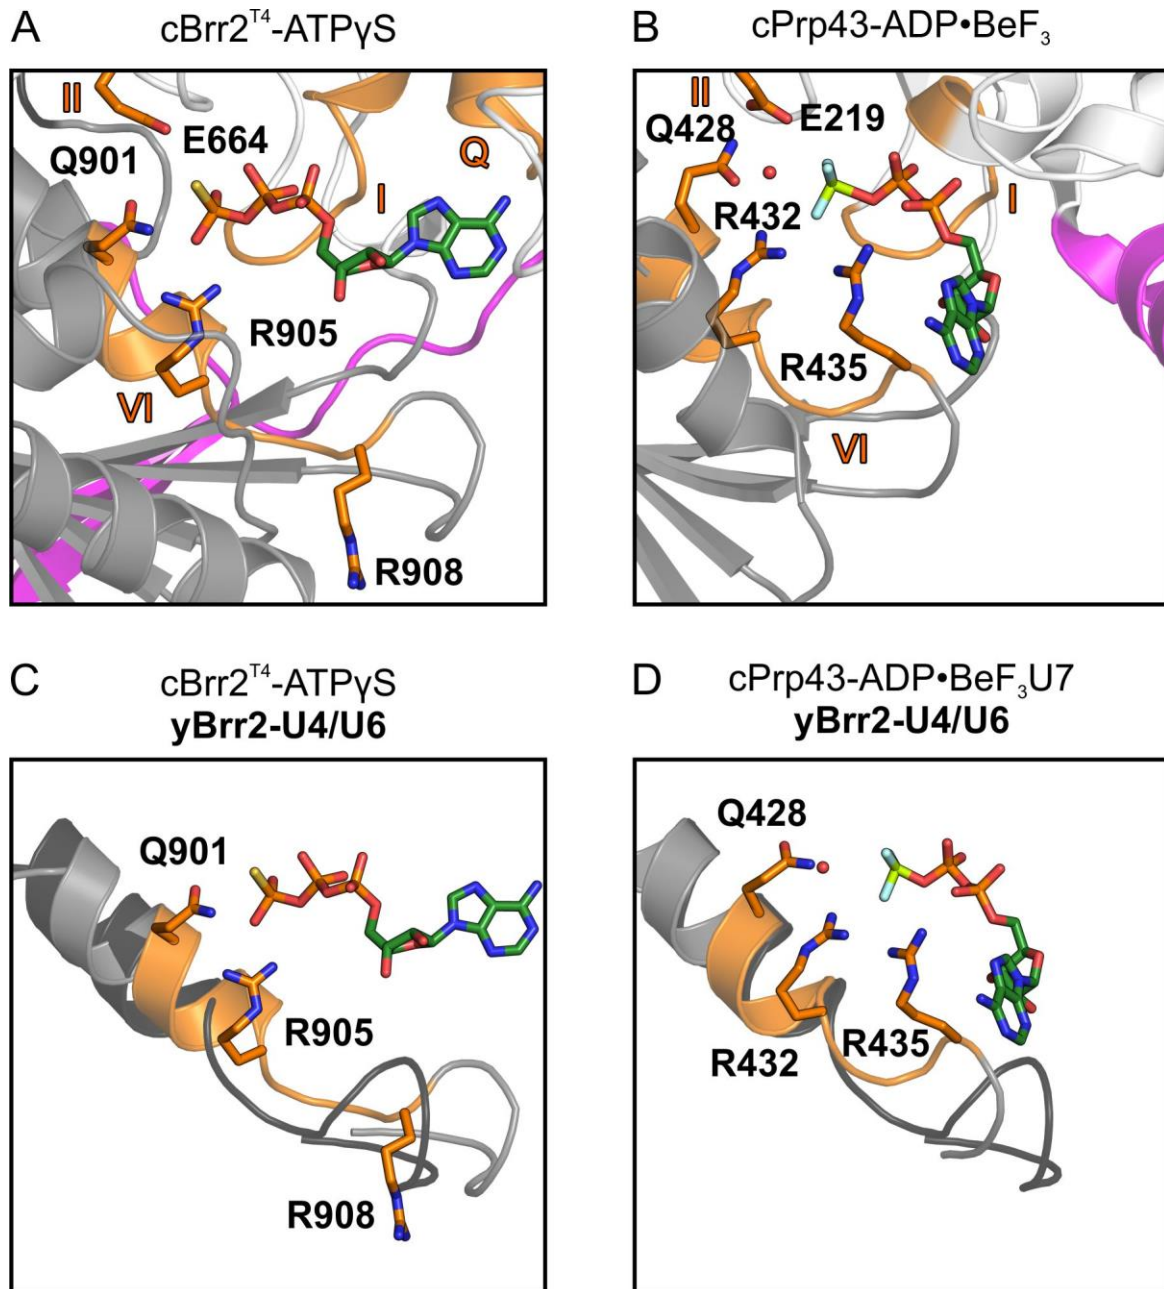

451

452

453 **Figure 3. Comparison of ATP Analog Binding by cBrr2<sup>T4</sup> and cPrp43**

454 (A) ATP $\gamma$ S bound by Q901 and R905 in the NC of cBrr2<sup>T4</sup> and position of E664 and R908 relative

455 to the nucleotide. (B) ADP•BeF<sub>3</sub> binding and positioning of an attacking water by E219, Q428 and

456 R432 and position of R435 relative to the nucleotide in a cPrp43-ADP•BeF<sub>3</sub> structure (PDB ID

457 5LTJ). (C) Superposition of cBrr2<sup>T4</sup>-ATP $\gamma$ S (cBrr2<sup>T4</sup>, gray and orange) and yeast (y) Brr2 (black)

458 bound to U4/U6 di-snRNA from a yeast U4/U6•U5 tri-snRNP structure (PDB ID 5GAN). (D)



459 Superposition of cPrp43-ADP•BeF<sub>3</sub> (cPrp43, gray and orange) bound to a U<sub>7</sub> RNA oligo (PDB ID  
460 5LTA) and yBrr2 (black) bound to U4/U6 di-snRNA from a yeast U4/U6•U5 tri-snRNP structure  
461 (PDB ID 5GAN). Only the α-helices containing motifs VI are shown for clarity. Domain coloring as  
462 in Figure 1. Motifs Q, I, II and VI, orange. Residues from motifs II and VI are shown as sticks and  
463 colored by atom type (carbon, orange; nitrogen, blue; oxygen, red). Nucleotides are shown as  
464 sticks and colored by atom type (beryllium, light green; carbon, dark green; nitrogen, blue; oxygen,  
465 red; fluorine, light blue; phosphorus, orange; sulfur, yellow). Red sphere, water oxygen. Structures  
466 are aligned with respect to their motifs I in the NC RecA1 domains.  
467

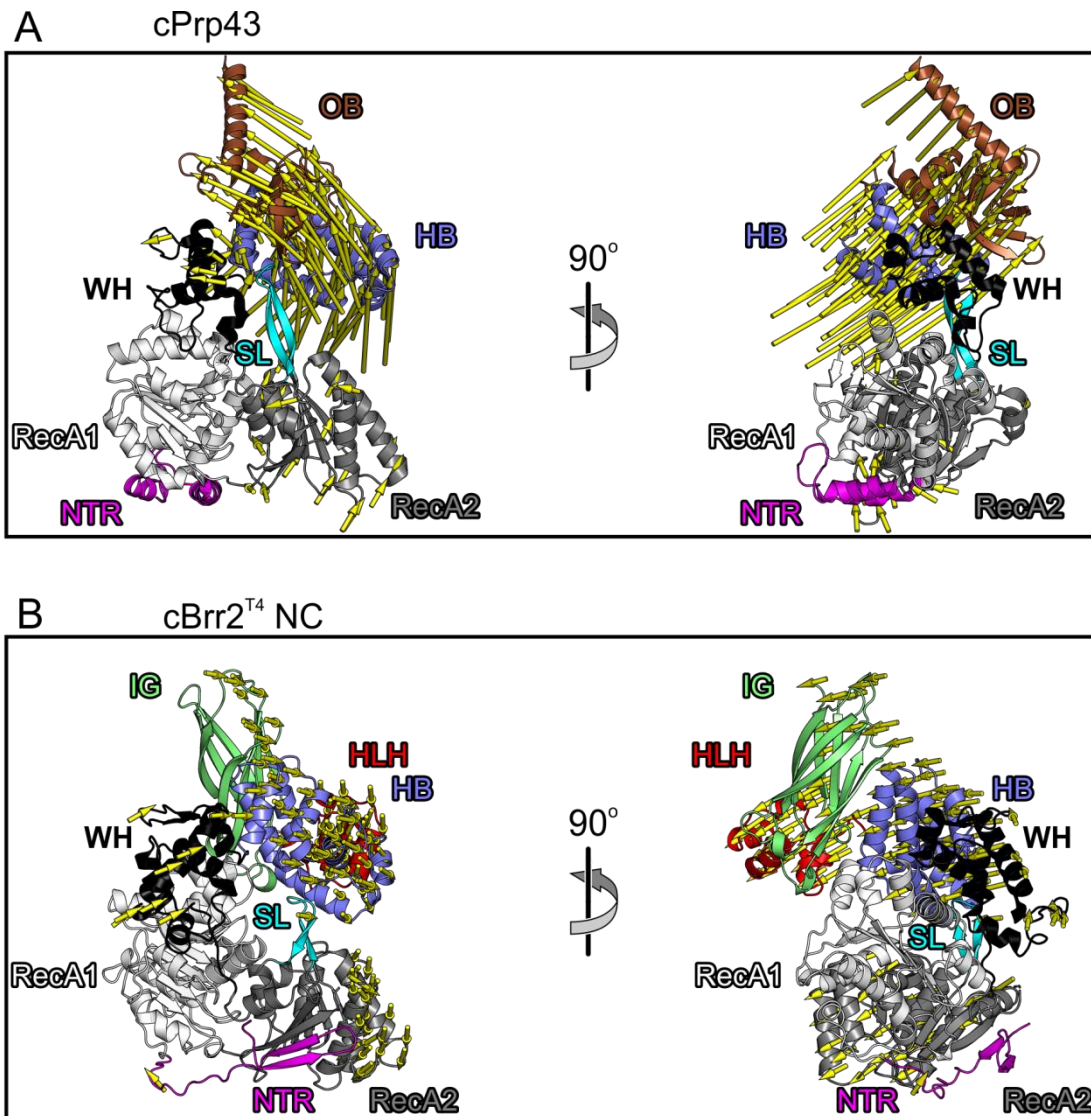

468  
469 **Figure 4. Domain Movements in cPrp43 and cBrr2<sup>T4</sup> Upon ATP Analog Binding**  
470 (A) Domain movements in cPrp43 from the ADP-bound conformation (base of mode vectors; PDB  
471 ID 5D0U) to the ADP•BeF<sub>3</sub>-bound conformation (head of mode vectors; PDB ID 5LTJ). (B) Domain  
472 movements in the cBrr2<sup>T4</sup> NC from the ADP-bound conformation (base of mode vectors) to the  
473 ATPγS-bound conformation (head of mode vectors). OB, brown; separator loop (SL), cyan; other  
474 domains/regions are colored as in Figure 1. Structures were aligned with respect to their motifs I  
475 in the (NC) RecA1 domains. cPrp43 and cBrr2<sup>T4</sup> NC are shown with the RecA domains in the  
476 same orientation.

477

## 478 **STAR METHODS**

### 479 **CONTACT FOR REAGENT AND RESOURCE SHARING**

480 Requests for resources and reagents should be directed to and will be fulfilled by the Lead  
481 Contact, Markus C. Wahl ([markus.wahl@fu-berlin.de](mailto:markus.wahl@fu-berlin.de)).

482

### 483 **METHOD DETAILS**

#### 484 **Protein Production and Purification**

485 A codon-optimized DNA fragment encoding residues 473-2193 of *C. thermophilum* Brr2 was  
486 cloned into a modified pFL vector (EMBL, Grenoble) and verified by sequencing to produce cBrr2<sup>T4</sup>  
487 bearing a TEV protease-cleavable N-terminal His<sub>10</sub>-tag (Absmeier et al., 2015a). The plasmid was  
488 transformed into *E. coli* DH10MultiBacY cells and further integrated *via* Tn7 transposition into the  
489 baculovirus genome (EMBacY) maintained as a bacterial artificial chromosome (BAC)  
490 (Trowitzsch et al., 2010). The Tn7 transposition site was embedded in a *lacZα* gene allowing the  
491 selection of positive EMBacY recombinants *via* blue/white screening. Recombinant EMBacY was  
492 isolated from the bacterial host and used to transfect Sf9 cells (Invitrogen).

493 For initial virus ( $V_0$ ) production, recombinant EMBacY was transfected into adhesive Sf9 cells  
494 (Invitrogen) in 6-well plates. The efficiency of transfection was monitored by eYFP fluorescence.  
495 The  $V_0$  virus generation was used to infect 50 ml Sf9 cells for virus amplification. The second, high  
496 titer virus generation ( $V_1$ ) was then used to infect 1200 ml High Five<sup>TM</sup> cells (Invitrogen) for large  
497 scale protein production (Santos et al., 2012). The infected cells were harvested when the eYFP  
498 signal reached a plateau and before the cell viability dropped below 90 %.

499 The High Five<sup>TM</sup> cell pellet was resuspended in 40 mM HEPES-NaOH, pH 8.0, 600 mM NaCl,  
500 1 mM DTT, 1.5 mM MgCl<sub>2</sub>, 20 mM imidazole, supplemented with EDTA-free protease inhibitor  
501 (Roche) and lysed by sonication using a Sonopuls Ultrasonic Homogenizer HD 3100 (Bandelin).  
502 The target protein was captured from the cleared lysate on a 5 ml HisTrap FF column (GE  
503 Healthcare) and eluted with a linear gradient from 20 to 500 mM imidazole. The His-tag was

504 cleaved with TEV protease during overnight dialysis at 4 °C against 40 mM HEPES-NaOH, pH  
505 8.0, 600 mM NaCl, 1 mM DTT. The cleaved protein was again loaded on a 5 ml HisTrap FF column  
506 to remove the His-tagged protease, uncut protein and cleaved His-tag. The flow-through  
507 containing the protein of interest was diluted to a final concentration of 80 mM NaCl, treated with  
508 RNaseA and loaded on a 5 ml Heparin column (GE Healthcare) equilibrated with 40 mM HEPES-  
509 NaOH, pH 8.0, 50 mM NaCl, 1 mM DTT. The protein was eluted with a linear 0.05 to 1.5 M NaCl  
510 gradient and further purified by gel filtration on a 16/60 Superdex 200 gel filtration column (GE  
511 Healthcare) in 10 mM Tris-HCl, pH 8.0, 200 mM NaCl, 2 mM DTT. Protein for activity assays was  
512 purified similarly, except that 10, 5 and 20 (v/v) % glycerol was added to the buffer for the HisTrap,  
513 Heparin and gel filtration step, respectively, and that the His-tag was not cleaved.

514

### 515 **Crystallographic Procedures**

516 Fractions containing the target protein were pooled, concentrated to 12 mg/ml and used for  
517 crystallization. Apo cBrr2<sup>T4</sup> crystals were grown in 24-well plates using the sitting-drop vapor  
518 diffusion technique at 18 °C with drops containing 1 µl protein complex solution and 1 µl reservoir  
519 solution (0.1 M Tris-HCl, pH 8.0, 24 % (w/v) PEG 3350, 0.2 M LiSO<sub>4</sub>). Initial crystals were further  
520 optimized by seeding. Crystals were cryo-protected by transfer into mother liquor containing 25 %  
521 (v/v) ethylene glycol and flash-cooled in liquid nitrogen. ADP- and ATPγS-bound cBrr2<sup>T4</sup> crystals  
522 were grown in 24-well plates using the sitting-drop vapor diffusion technique at 18 °C with drops  
523 containing 1 µl protein solution (9 mg/ml; supplemented with 2 mM ADP•AlF<sub>3</sub>/ATPγS and 6 mM  
524 MgCl<sub>2</sub>) and 1 µl reservoir solution (0.1 M Tris-HCl, pH 8.0, 9 % (w/v) PEG 8000, 0.2 M Ca(OAc)<sub>2</sub>)  
525 and further optimized by seeding. Crystals were soaked and cryo-protected by transfer into mother  
526 liquor supplemented with the respective nucleotides and cryo-protectant (0.1 M Tris-HCl, pH 8.0,  
527 9 % (w/v) PEG 8000, 25 % (v/v) PEG 400, 0.2 M NaOAc, 12 mM ADP•AlF<sub>3</sub>/6 mM MnCl<sub>2</sub> or 25 mM  
528 ATPγS/12 mM MnCl<sub>2</sub>) and flash-cooled in liquid nitrogen.

529 Diffraction data were collected at 100 K on beamline 14.1 of the BESSY II storage ring, Berlin,

530 Germany (Mueller et al., 2015) with a monochromated X-ray beam ( $\lambda = 0.9184 \text{ \AA}$  or  $1.8814 \text{ \AA}$ ) and  
531 processed with XDSAPP (Sparta et al., 2016) (Table 1). The structures were solved by molecular  
532 replacement with PHASER (McCoy et al., 2007) using cBrr2<sup>T3</sup>-cJab1 structure coordinates as a  
533 search model (PDB ID 5M59) (Absmeier et al., 2016a). The structures were refined by alternating  
534 rounds of manual model building with Coot (Emsley et al., 2010) and automated refinement with  
535 PHENIX (Adams et al., 2002; Afonine et al., 2012) (Table 1).

536

### 537 **Structural Comparisons**

538 Structures were superimposed using the Secondary Structure Matching tool of Coot.

539

### 540 **Unwinding Assays**

541 Unwinding assays were conducted and evaluated as described (Mozaffari-Jovin et al., 2013;  
542 Santos et al., 2012). Briefly, U4/U6 di-snRNA complex (2 nM) and cBrr2<sup>T4</sup> (100 nM) were mixed in  
543 40 mM Tris-HCl, pH 7.5, 50 mM NaCl, 1.5 mM DTT, 0.1 mg/ml acetylated BSA. After incubation  
544 for 3 min at 30 °C, reactions were started by the addition of different concentrations of ATP/MgCl<sub>2</sub>  
545 (2, 4, 6, 8, 10, 25 mM). 10  $\mu$ l samples were taken after 20 min, mixed with 10  $\mu$ l 40 mM Tris-HCl,  
546 pH 7.4, 50 mM NaCl, 25 mM EDTA, 1 % (w/v) SDS, 10 % (v/v) glycerol, 0.05 % (w/v) xylene  
547 cyanol, 0.05 % (w/v) bromophenol blue and separated using 6 % RNA native PAGE (19:1). Gels  
548 were scanned on a phosphoimager.

549

### 550 **QUANTIFICATION AND STATISTICAL ANALYSIS**

551 Not applicable.

552

553 **DATA AND SOFTWARE AVAILABILITY**

554       Coordinates and structure factors for the cBrr2<sup>T4</sup> apo and nucleotide-bound structures have  
555 been deposited in the Protein Data Bank ([www.pdb.org](http://www.pdb.org)) under access codes 6QWS (apo cBrr2<sup>T4</sup>),  
556 6QV3 (cBrr2<sup>T4</sup>-ADP) and 6QV4 (cBrr2<sup>T4</sup>-ATP $\gamma$ S) and will be released upon publication.

557

558 **SUPPLEMENTAL INFORMATION**

559

560 **Molecular Mechanism Underlying Inhibition of Intrinsic**  
561 **ATPase Activity in a Ski2-like RNA Helicase**

562

563 Eva Absmeier<sup>1,†,\*</sup>, Karine F. Santos<sup>1,†,#</sup>, Markus C. Wahl<sup>1,2,3,\*</sup>

564

565 <sup>1</sup> Freie Universität Berlin, Institute of Chemistry and Biochemistry, Laboratory of Structural  
566 Biochemistry, Takustraße 6, 14195 Berlin, Germany

567 <sup>2</sup> Helmholtz-Zentrum Berlin für Materialien und Energie, Macromolecular Crystallography,  
568 12489 Berlin, Germany

569 <sup>3</sup> Lead Contact

570 † These authors contributed equally to this work.

571 # Present address: Spingotec GmbH, Neuendorfstr. 15A, 16761 Henningsdorf, Germany

572 \* Correspondence: [absmeier@zedat.fu-berlin.de](mailto:absmeier@zedat.fu-berlin.de); [markus.wahl@fu-berlin.de](mailto:markus.wahl@fu-berlin.de)

573

574 **SUPPLEMENTAL FIGURES**

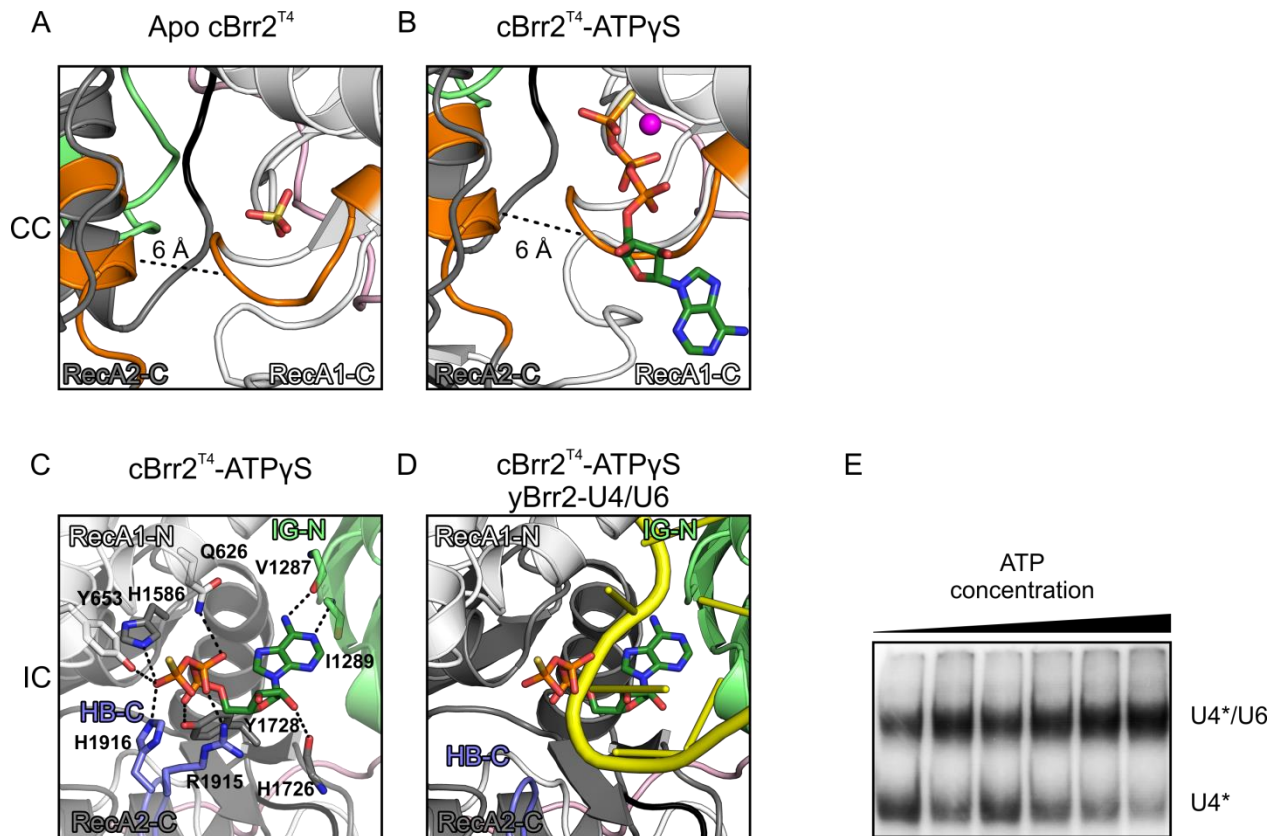

575

576 **Figure S1. Nucleotide binding to the CC and between cassettes, related to Figure 2.**

577 (A,B) Distances between motif I (RecA1-C, Ca-atom of G1404) and motif VI (RecA2-C, Ca-atom  
 578 of G1741) in the CCs of the apo cBrr2<sup>T4</sup> (A) and cBrr2<sup>T4</sup>-ATPyS (B) structures. Coloring as in  
 579 Figure 2. RecA1/2-C, RecA1/2 domains of the CC. (C) ATPyS binding between the cassettes by  
 580 residues of the RecA1-N, IG-N, RecA2-C and HB-C domains. Domains are colored as in Figure 1  
 581 and interacting residues are shown as sticks and colored by atom type, as in Figure 2. IC, inter-  
 582 cassette binding site; IG-N, immunoglobulin-like domain of the NC; HB-C, helical bundle domain  
 583 of the CC. (D) Superposition of the cBrr2<sup>T4</sup>-ATPyS structure and yeast U4 snRNA from a yeast  
 584 U4/U6•U5 tri-snRNP structure (PDB ID 5GAN). Domains and ATPyS are colored as in Figures 1  
 585 and 2 and RNA is colored yellow. (E) cBrr2<sup>T4</sup>-mediated U4/U6 di-snRNA unwinding (single time  
 586 points) at increasing ATP concentrations (2, 4, 6, 8, 10, 25 mM ATP).
